# Supplementary material
Source: HighWire-hosted journal article supplement (https://bmjopen.bmj.com/content/15/2/e092156)
Supplement: inline-supplementary-material-2 [file inline-supplementary-material-2.pdf]

Data Extraction Template

| Author(s)/<br>year of<br>publication | Origin/Country<br>of origin<br>(Published or<br>conducted) | Aim/Purpose | Population<br>and<br>sample<br>size | Rehabilitation<br>setting/<br>context | Methodology/<br>Design | Identification<br>of<br>overweight,<br>e.g.<br>screening,<br>weighing | Intervention<br>type, content<br>(e.g. digital<br>weight<br>management,<br>professional<br>support,<br>nutritional care<br>plans,<br>monitoring,<br>and/or nutrition<br>education)<br>intensity,<br>duration, and<br>context of use. | Persons in<br>charge<br>Initiation and<br>daily<br>provision of<br>the<br>intervention? | Outcome,<br>evaluation<br>and<br>monitoring. |
|--------------------------------------|------------------------------------------------------------|-------------|-------------------------------------|---------------------------------------|------------------------|-----------------------------------------------------------------------|--------------------------------------------------------------------------------------------------------------------------------------------------------------------------------------------------------------------------------------|-----------------------------------------------------------------------------------------|----------------------------------------------|
|                                      |                                                            |             |                                     |                                       |                        |                                                                       |                                                                                                                                                                                                                                      |                                                                                         |                                              |
|                                      |                                                            |             |                                     |                                       |                        |                                                                       |                                                                                                                                                                                                                                      |                                                                                         |                                              |
|                                      |                                                            |             |                                     |                                       |                        |                                                                       |                                                                                                                                                                                                                                      |                                                                                         |                                              |
|                                      |                                                            |             |                                     |                                       |                        |                                                                       |                                                                                                                                                                                                                                      |                                                                                         |                                              |
|                                      |                                                            |             |                                     |                                       |                        |                                                                       |                                                                                                                                                                                                                                      |                                                                                         |                                              |
|                                      |                                                            |             |                                     |                                       |                        |                                                                       |                                                                                                                                                                                                                                      |                                                                                         |                                              |
|                                      |                                                            |             |                                     |                                       |                        |                                                                       |                                                                                                                                                                                                                                      |                                                                                         |                                              |
|                                      |                                                            |             |                                     |                                       |                        |                                                                       |                                                                                                                                                                                                                                      |                                                                                         |                                              |
|                                      |                                                            |             |                                     |                                       |                        |                                                                       |                                                                                                                                                                                                                                      |                                                                                         |                                              |
|                                      |                                                            |             |                                     |                                       |                        |                                                                       |                                                                                                                                                                                                                                      |                                                                                         |                                              |
|                                      |                                                            |             |                                     |                                       |                        |                                                                       |                                                                                                                                                                                                                                      |                                                                                         |                                              |
|                                      |                                                            |             |                                     |                                       |                        |                                                                       |                                                                                                                                                                                                                                      |                                                                                         |                                              |
|                                      |                                                            |             |                                     |                                       |                        |                                                                       |                                                                                                                                                                                                                                      |                                                                                         |                                              |
|                                      |                                                            |             |                                     |                                       |                        |                                                                       |                                                                                                                                                                                                                                      |                                                                                         |                                              |
